# Supplementary material
Source: MDPI journal article supplement (https://www.mdpi.com/2076-3417/14/4/1538)

# *Photinia x fraseri*

| Code | Substrate (in volume)                                               |
|------|---------------------------------------------------------------------|
| CGM  | Peat – Pumice (1:1) 100%                                            |
| GM1  | Peat – Pumice (1:1) 50% – dredged sediments – green waste (3:1) 50% |
| GM2  | Peat – Pumice (1:1) 50% – dredged sediments – green waste (1:1) 50% |
| GM3  | Peat – Pumice (1:1) 50% – dredged sediments – green waste (1:3) 50% |
| GM4  | Dredged sediments – green waste (3:1)                               |
| GM5  | Dredged sediments – green waste (1:1)                               |
| GM6  | Dredged sediments – green waste (1:3)                               |

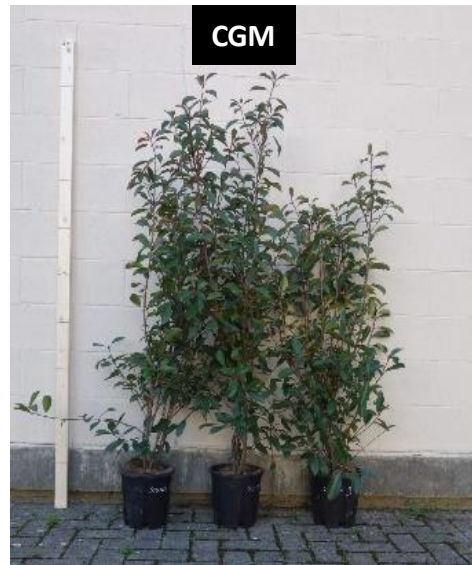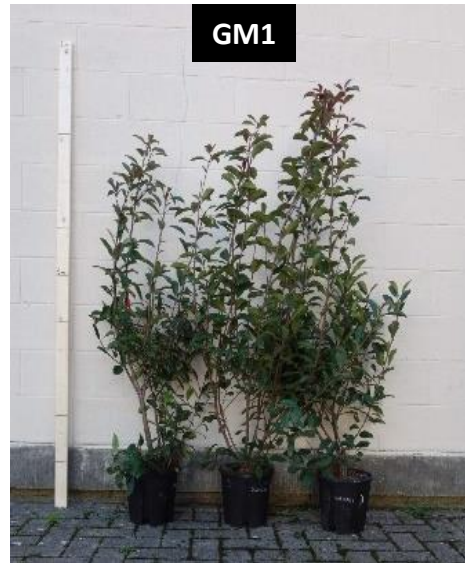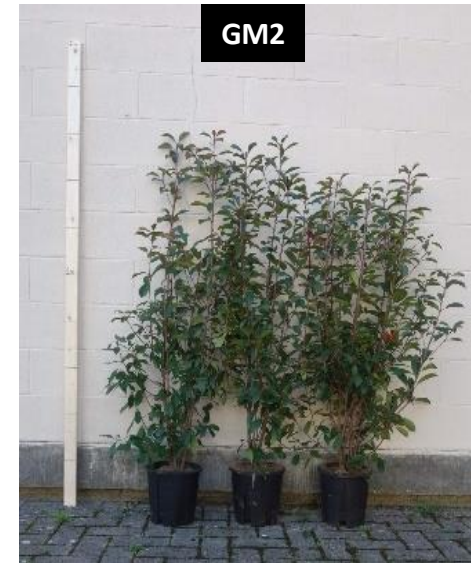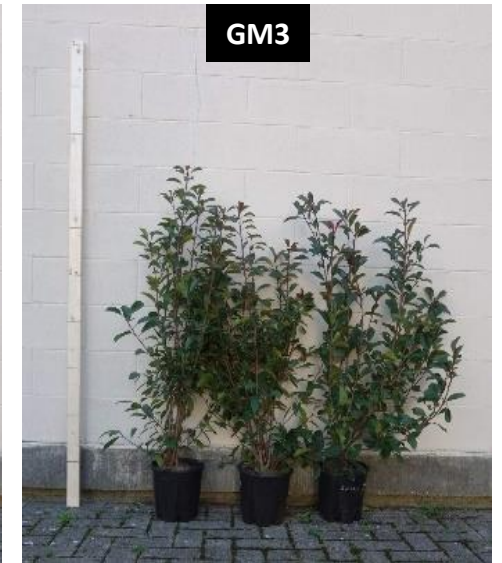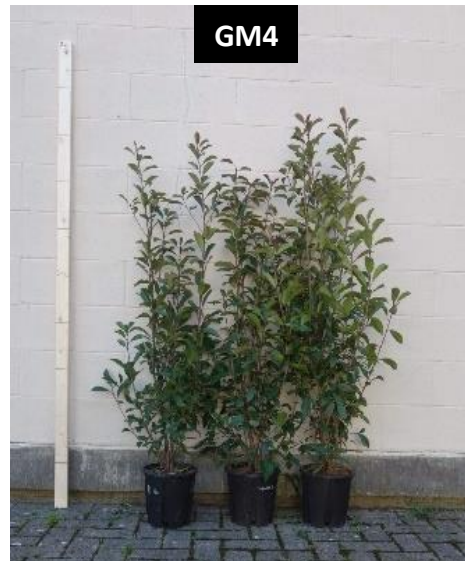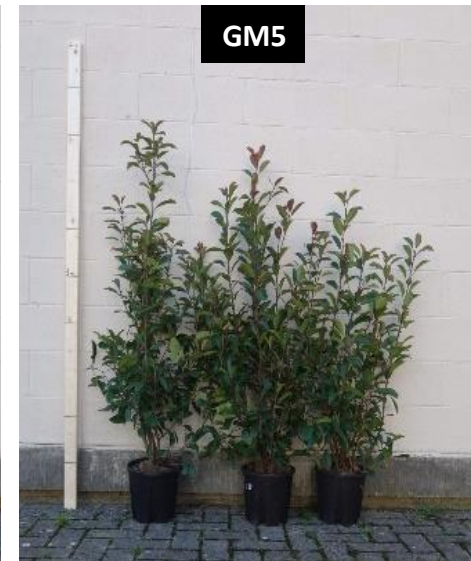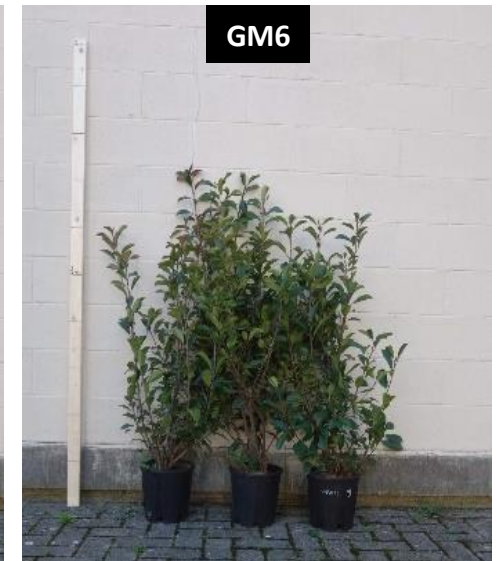



# *Viburnum tinus*

| Code | Substrate (in volume)                                               |
|------|---------------------------------------------------------------------|
| CGM  | Peat – Pumice (1:1) 100%                                            |
| GM1  | Peat – Pumice (1:1) 50% – dredged sediments – green waste (3:1) 50% |
| GM2  | Peat – Pumice (1:1) 50% – dredged sediments – green waste (1:1) 50% |
| GM3  | Peat – Pumice (1:1) 50% – dredged sediments – green waste (1:3) 50% |
| GM4  | Dredged sediments – green waste (3:1)                               |
| GM5  | Dredged sediments – green waste (1:1)                               |
| GM6  | Dredged sediments – green waste (1:3)                               |

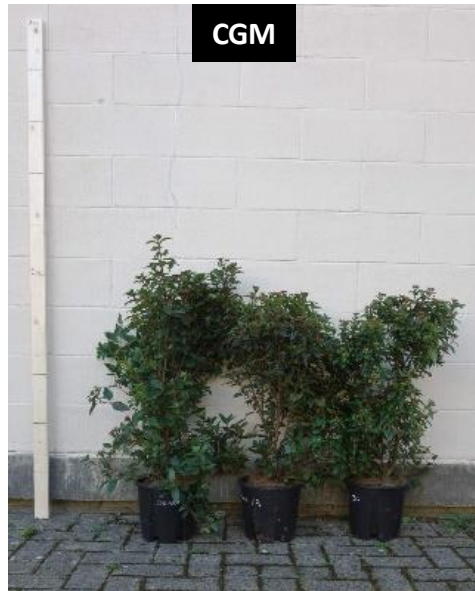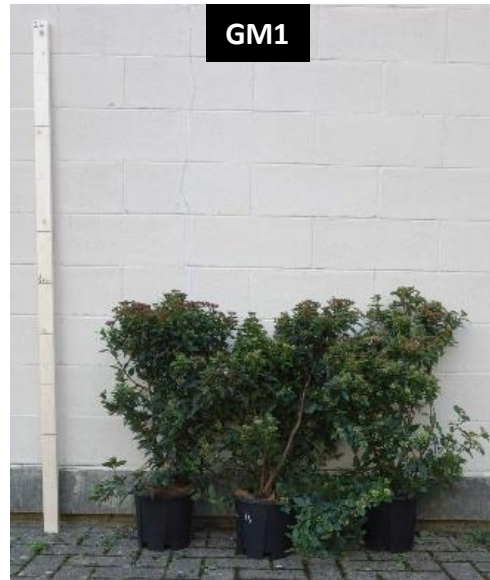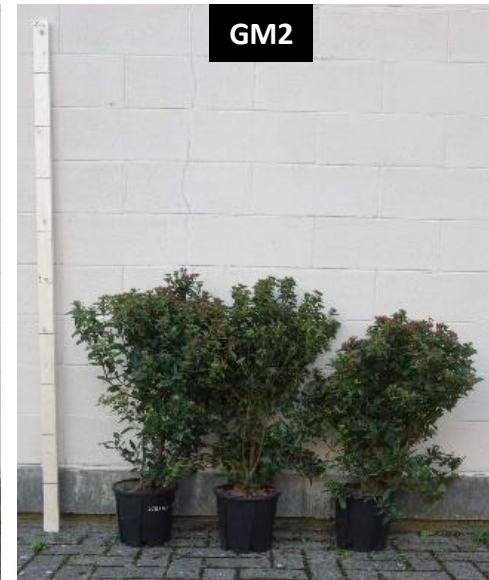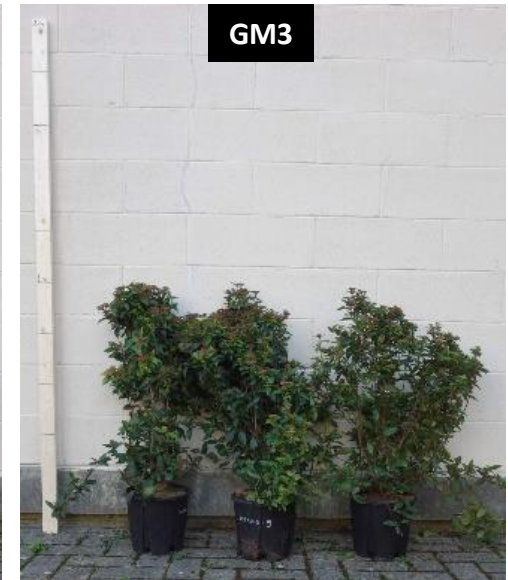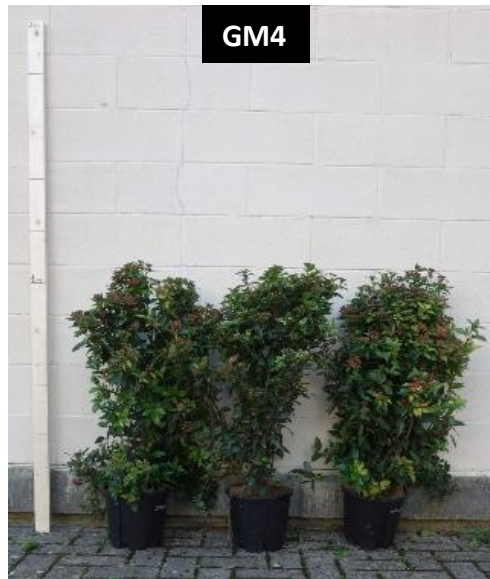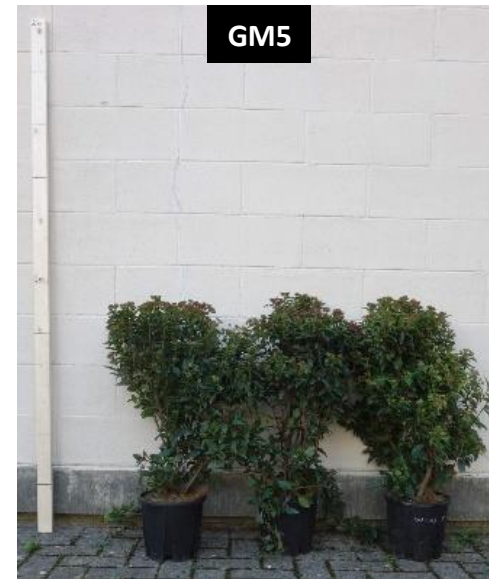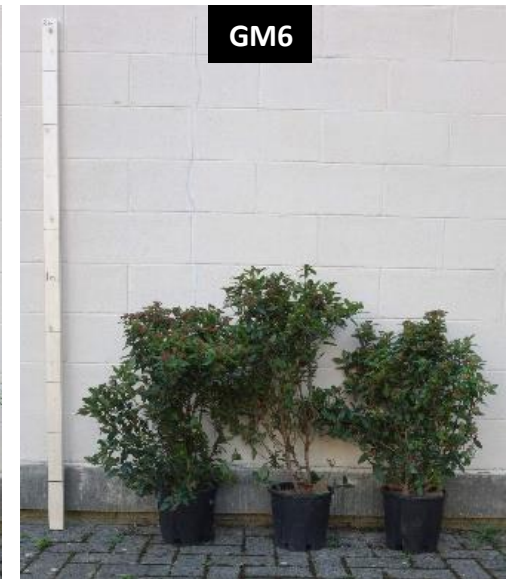

Supplement: s1 [file s1]
