# Supplementary material
Source: MDPI journal article supplement (https://www.mdpi.com/2076-3417/14/4/1538)

Photinia X fraseri

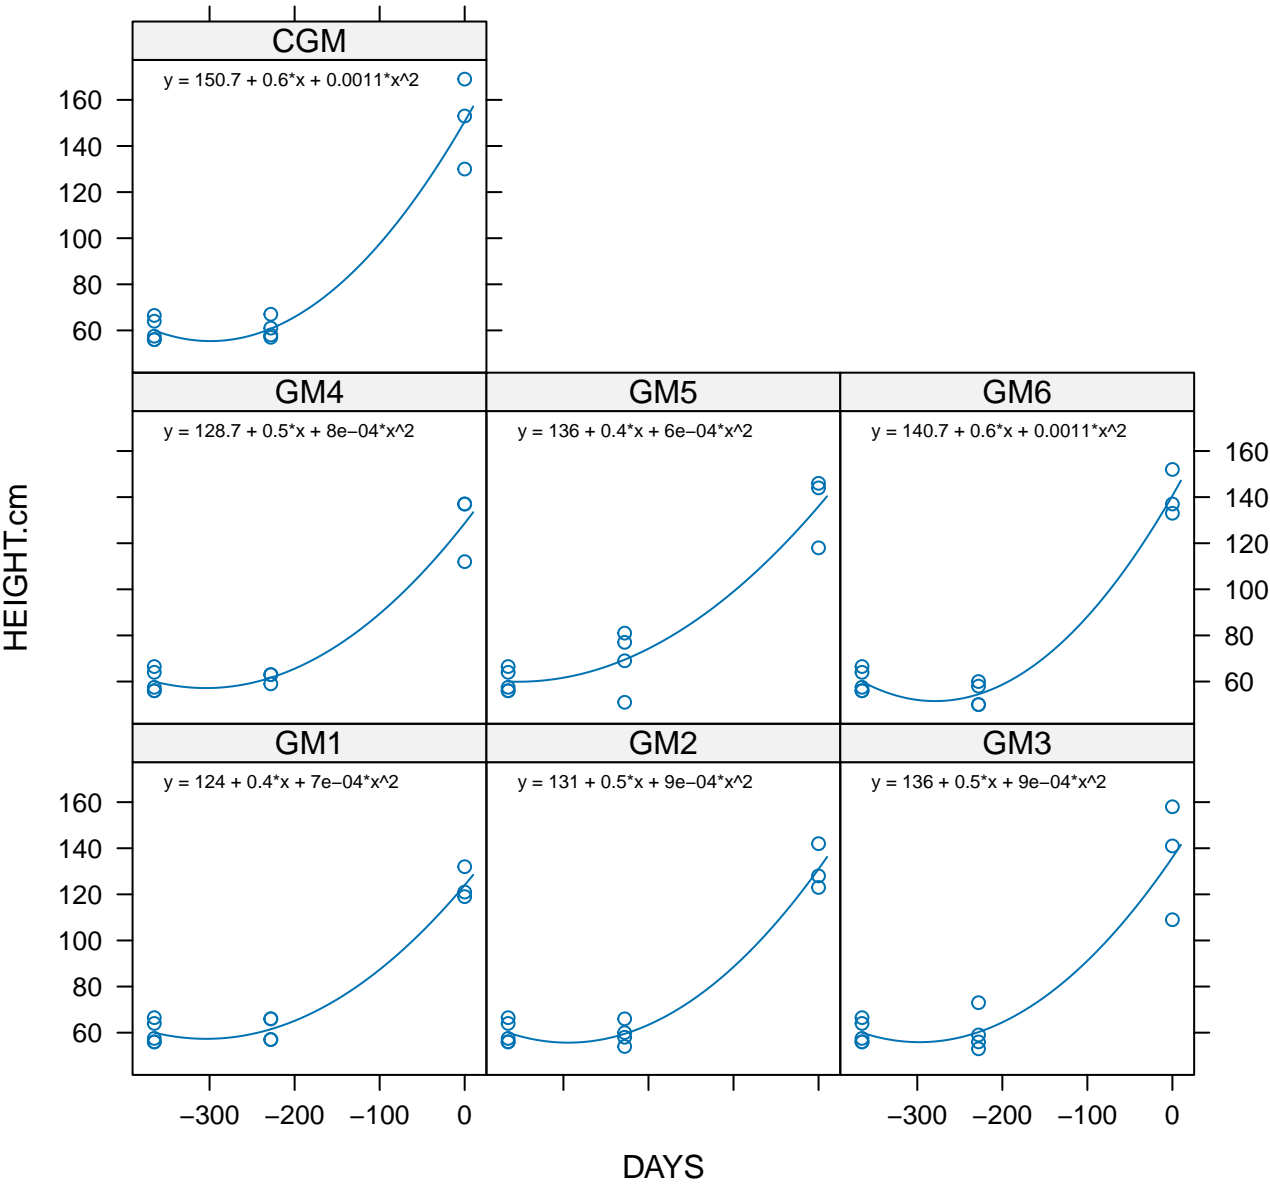

## Photinia X fraseri

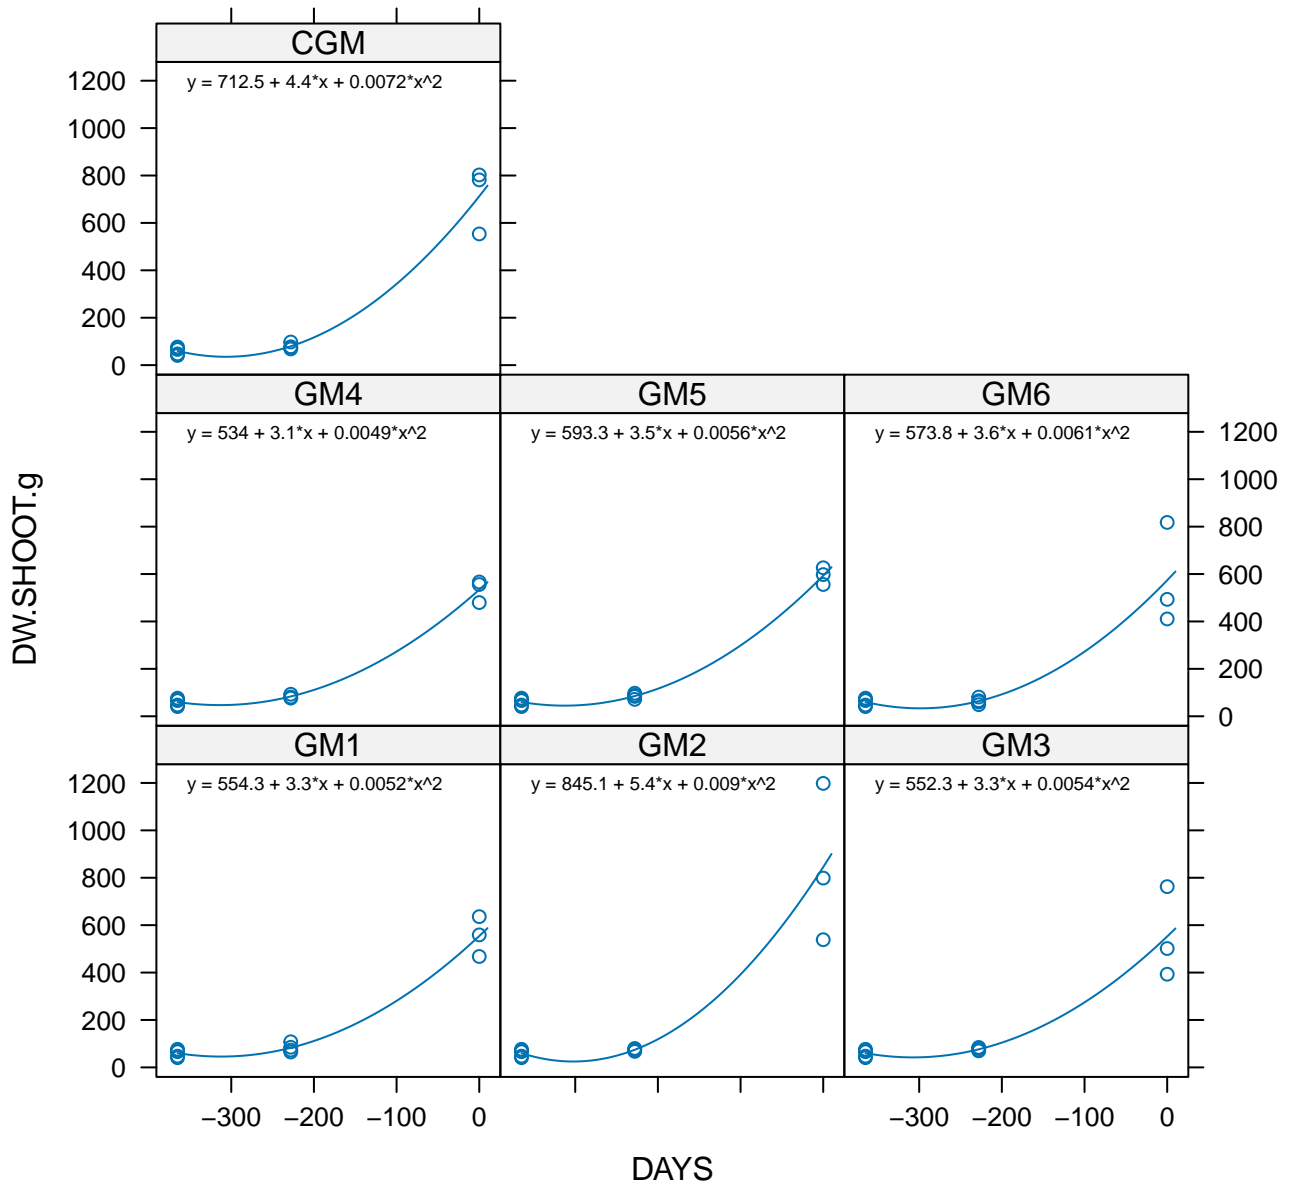

Photinia X fraseri

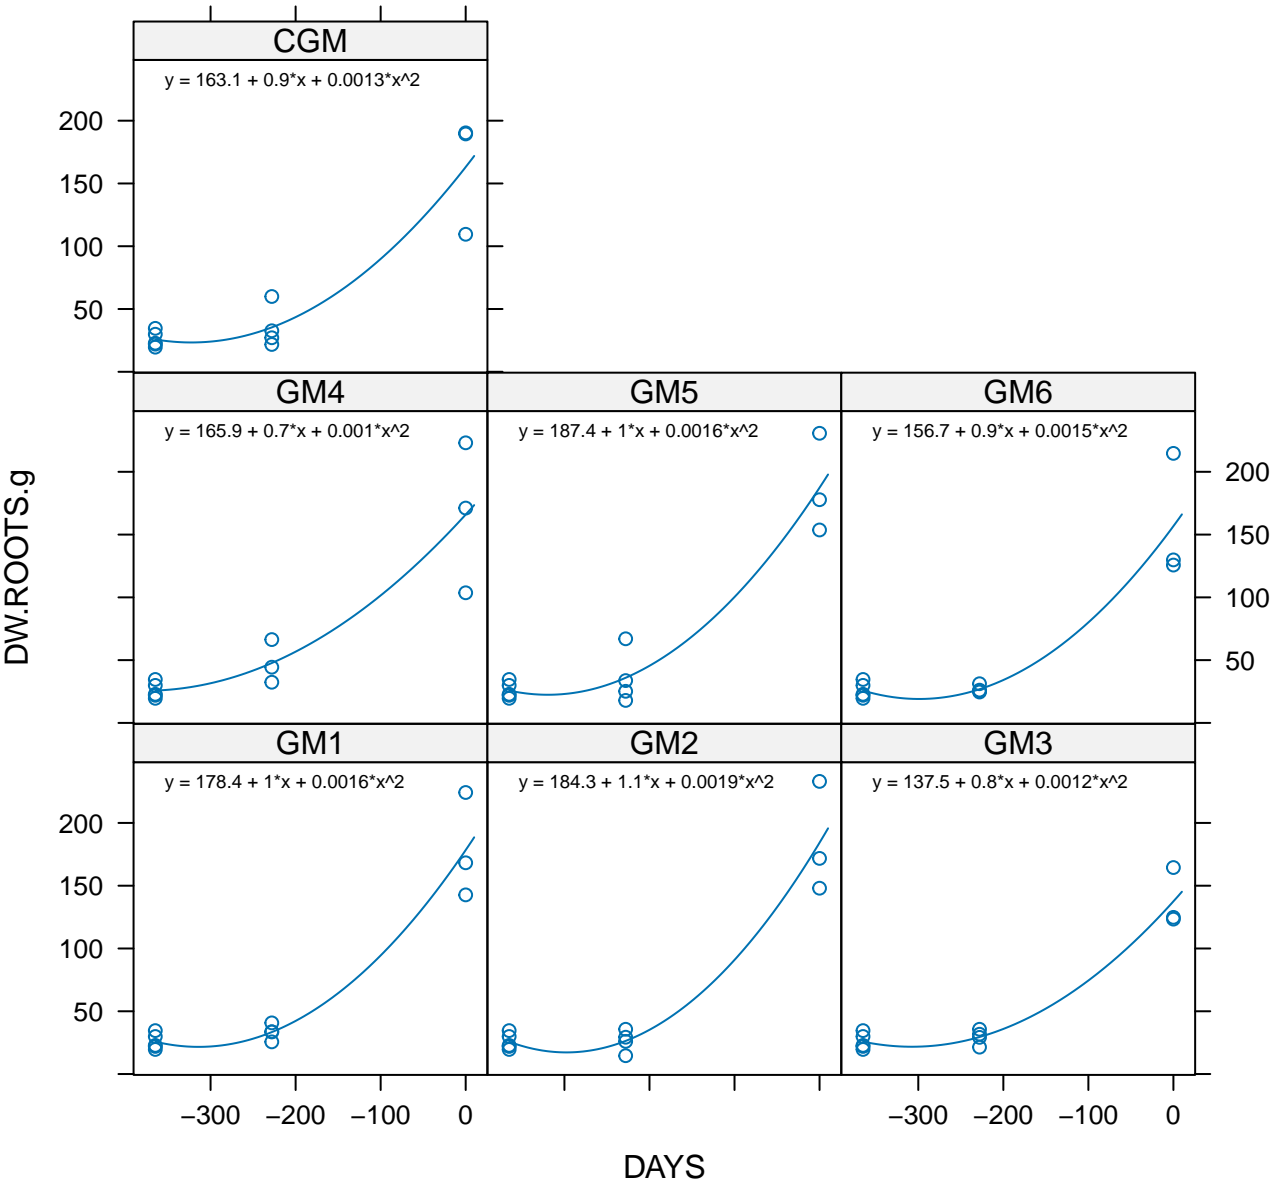

Viburnum tinus

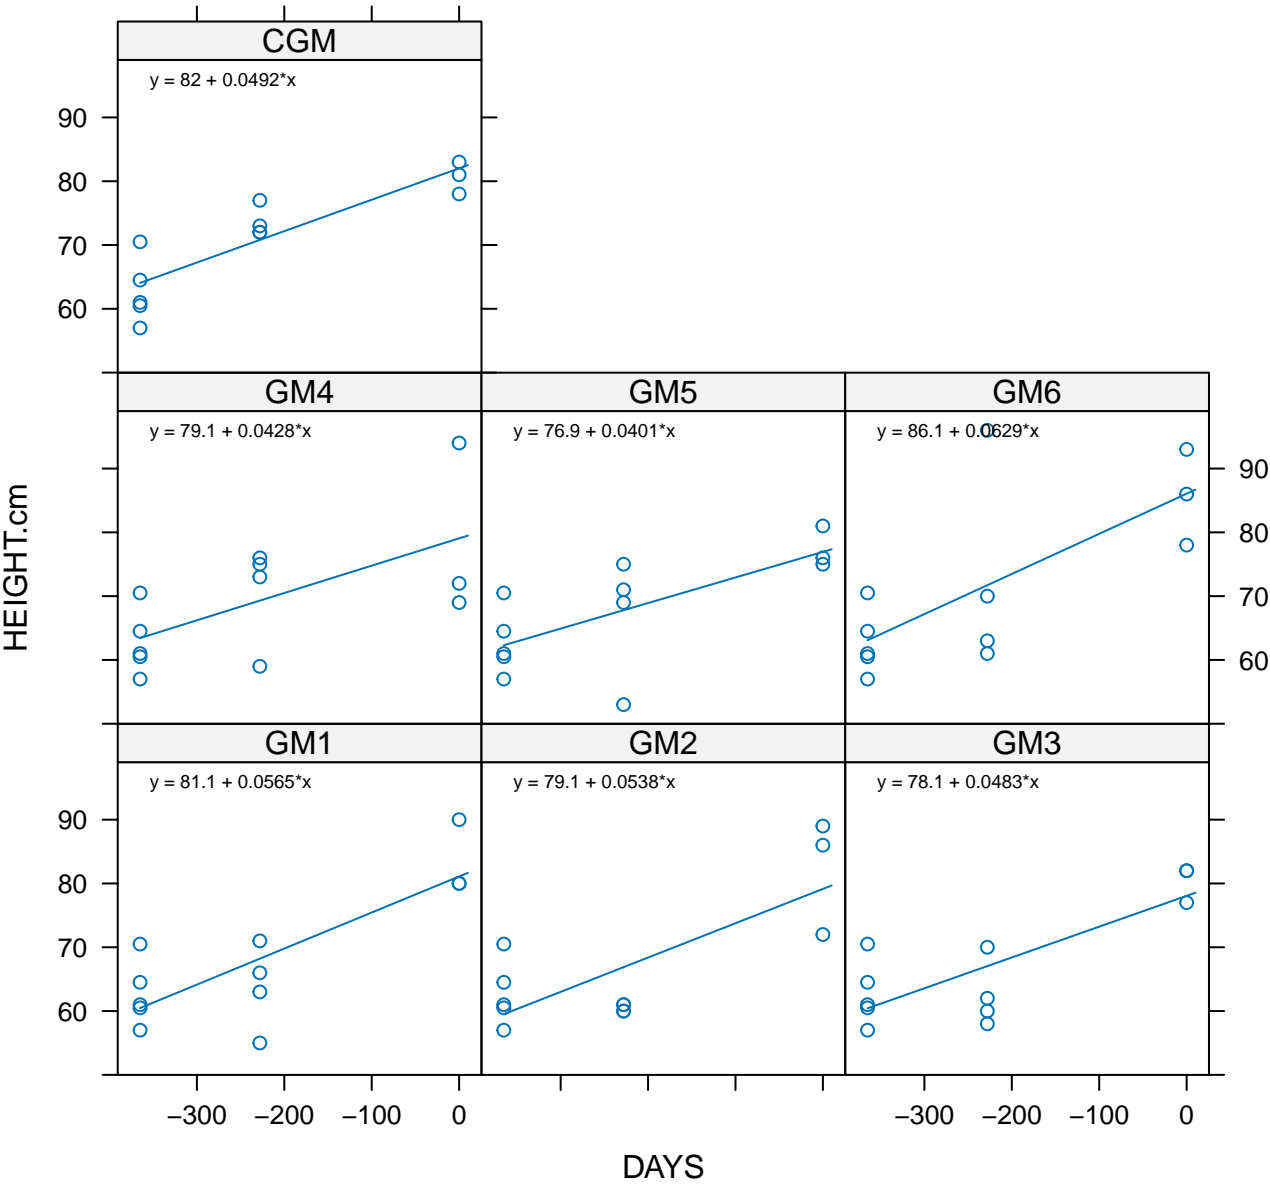

Viburnum tinus

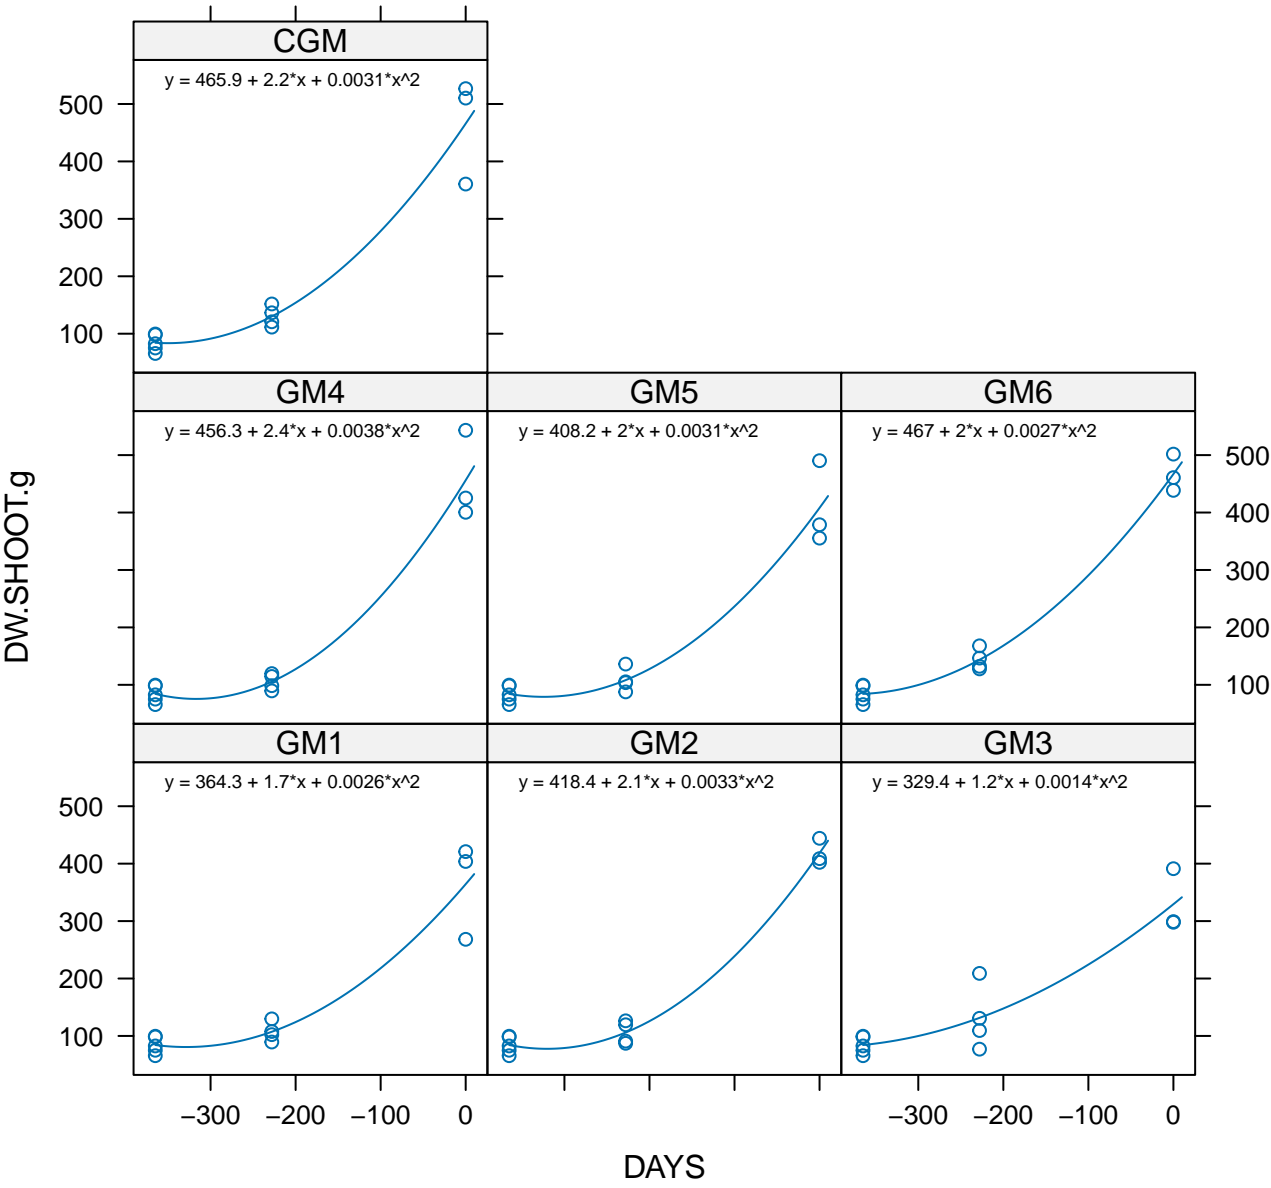

Viburnum tinus

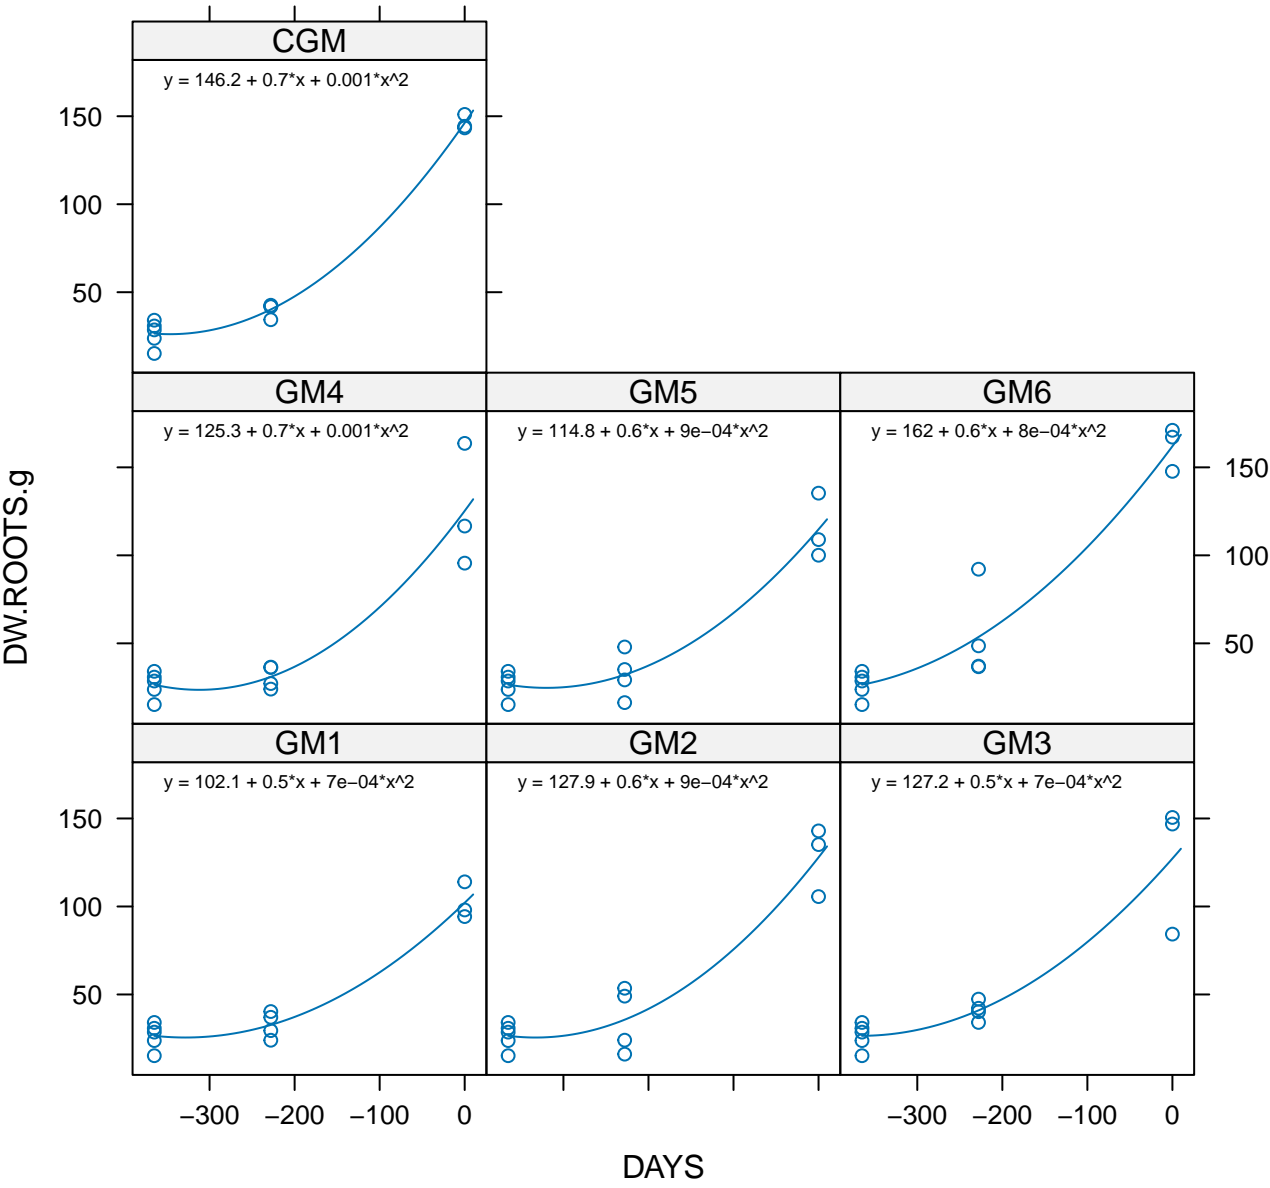

Supplement: s1 [file s1]
